# Supplementary material
Source: PubMed Central journal article supplement (PMC9649426)
Supplement: ciac533_supplementary_data.pdf [file ciac533_supplementary_data.pdf]

**Supplement to *Risk Factors for Death or Meningitis in Adults Hospitalized for Cutaneous Anthrax: A Systematic Review, 1950-2018***

By Thompson JM et al.

Published in *Clinical Infectious Diseases*

## Table of Contents

|                                |                                                                                                                                                                                                                                                       |   |
|--------------------------------|-------------------------------------------------------------------------------------------------------------------------------------------------------------------------------------------------------------------------------------------------------|---|
| <b>Supplementary Figure 1.</b> | Systematic Review Search Strategy for Adults Hospitalized for Cutaneous Anthrax, 1950-2018 .....                                                                                                                                                      | 3 |
| <b>Supplementary Table 1.</b>  | Demographics and Clinical Findings on Presentation Associated with Early ( $\leq 72$ -Hours After Hospitalization) and Late ( $> 72$ -Hours After Hospitalization) Mortality Among Adults Hospitalized for Cutaneous Anthrax, 1950-2018 (N=182) ..... | 4 |

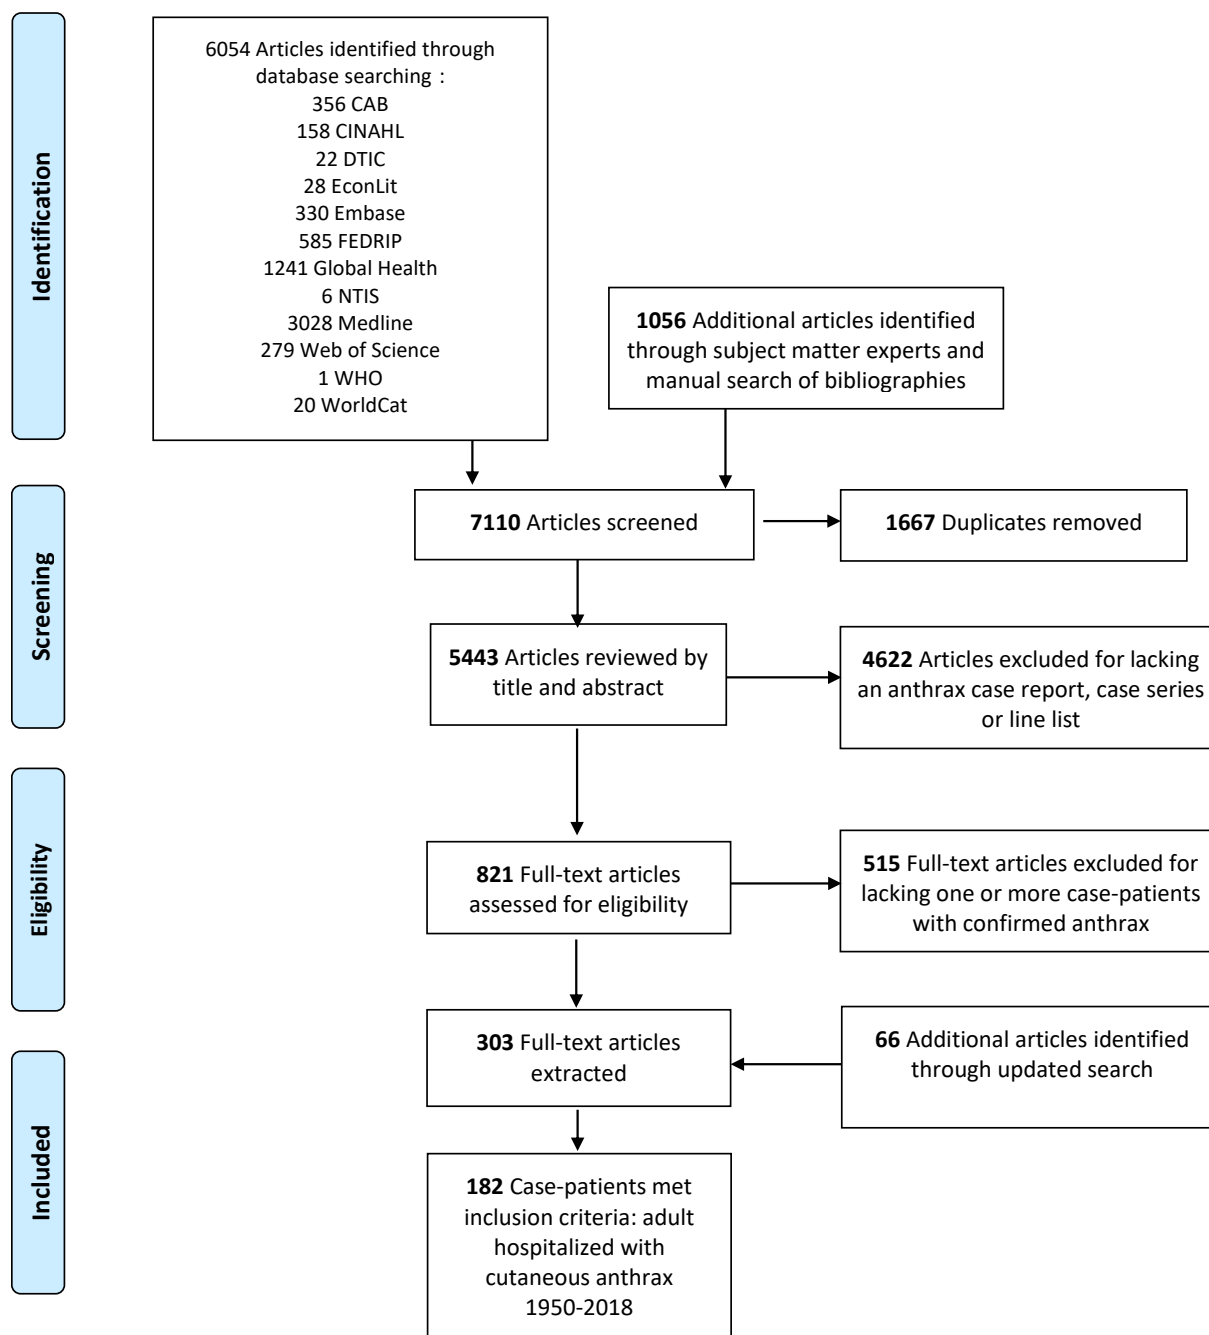

**Supplementary Figure 1.** Systematic Review Search Strategy for Adults Hospitalized for Cutaneous Anthrax, 1950-2018. Abbreviations of databases include CAB, Commonwealth Agricultural Bureaux; CINAHL, Cumulative Index to Nursing and Allied Health Literature; DTIC, Defense Technical Information Center; FEDRIP, Federal Research in Progress; NTS, National Technical Information Service; and WHO, World Health Organization. “Hospitalized” included patients who received ongoing medical care in their homes.

**Supplementary Table 1. Demographics and Clinical Findings on Presentation Associated with Early ( $\leq 72$ -Hours After Hospitalization) and Late ( $>72$ -Hours After Hospitalization) Mortality Among Adults Hospitalized for Cutaneous Anthrax, 1950-2018 (N=182)**

| Characteristic                             | Survived |        | Early fatalities vs. Survival |    |        |    |                       | Late fatalities vs. Survival |    |        |    |                       |         |
|--------------------------------------------|----------|--------|-------------------------------|----|--------|----|-----------------------|------------------------------|----|--------|----|-----------------------|---------|
|                                            | n        | (%)    | N                             | n  | (%)    | N  | OR (95% CI)           | P value                      | n  | (%)    | N  | OR (95% CI)           | P value |
| Overall                                    | 135      | (74.2) | 28                            | 13 | (15.4) |    |                       |                              | 13 | (7.1)  |    |                       |         |
| <b>Demographics</b>                        |          |        |                               |    |        |    |                       |                              |    |        |    |                       |         |
| <b>Age (years)</b>                         |          |        |                               |    |        |    |                       |                              |    |        |    |                       |         |
| 18-45                                      | 89       | (67.4) | 132                           | 14 | (50.0) | 28 | Reference             | -                            | 1  | (7.7)  | 13 | Reference             | -       |
| 46-64                                      | 40       | (30.3) | 132                           | 12 | (42.9) | 28 | 1.9 (.7, 4.9)         | .2                           | 10 | (76.9) | 13 | 21.8 (2.9, $\infty$ ) | <.001   |
| 65+                                        | 3        | (2.3)  | 132                           | 2  | (7.1)  | 28 | 4.2 (.3, 39.8)        | .3                           | 2  | (15.4) | 13 | 49.7 (2.1, $\infty$ ) | .01     |
| <b>Sex</b>                                 |          |        |                               |    |        |    |                       |                              |    |        |    |                       |         |
| Male                                       | 94       | (69.6) | 134                           | 23 | (82.1) | 28 | 2.0 (.7, 7.0)         | .3                           | 10 | (76.9) | 13 | 1.4 (.3, 8.4)         | .2      |
| Female                                     | 40       | (29.6) | 134                           | 5  | (17.9) | 28 | Reference             | -                            | 3  | (23.1) | 13 | Reference             | -       |
| Pregnant                                   | 3        | (7.5)  | 40                            | 1  | (20.0) | 5  | 3.0 (.1, 49.8)        | .8                           | 1  | (33.3) | 3  | 5.7 (.1, 145.0)       | .5      |
| Not pregnant                               | 37       | (92.5) | 40                            | 4  | (80.0) | 5  | Reference             | -                            | 2  | (66.7) | 3  | Reference             | -       |
| <b>Geographic region<sup>a</sup></b>       |          |        |                               |    |        |    |                       |                              |    |        |    |                       |         |
| European Region                            | 74       | (54.8) | 135                           | 5  | (17.9) | 28 | Reference             | -                            | 5  | (38.5) | 13 | Reference             | -       |
| Eastern Mediterranean Region               | 23       | (17.0) | 135                           | 1  | (3.6)  | 28 | 0.6 (0, 6.2)          | 1.0                          | 3  | (23.1) | 13 | 1.2 (.3, 10.7)        | .6      |
| Region of the Americas                     | 16       | (11.9) | 135                           | 3  | (10.7) | 28 | 2.7 (.4, 15.8)        | .4                           | 2  | (15.4) | 13 | 1.8 (.2, 12.5)        | .8      |
| Western Pacific Region                     | 6        | (4.4)  | 135                           | 2  | (7.1)  | 28 | 4.8 (.4, 38.6)        | .2                           | 1  | (7.7)  | 13 | 2.4 (0, 28.0)         | .9      |
| South-East Asia Region                     | 12       | (7.8)  | 135                           | 14 | (50.0) | 28 | 16.5 (4.6, 70.2)      | <.0001                       | 0  | (0)    | 13 | 0.9 (0, 5.6)          | .5      |
| African Region                             | 4        | (3.0)  | 135                           | 3  | (10.7) | 28 | 10.5 (1.2, 84.7)      | .03                          | 2  | (15.4) | 13 | 7.1 (.5, 66.4)        | .1      |
| <b>Clinical findings</b>                   |          |        |                               |    |        |    |                       |                              |    |        |    |                       |         |
| <b>Symptoms</b>                            |          |        |                               |    |        |    |                       |                              |    |        |    |                       |         |
| Fever or chills                            | 53       | (39.8) | 133                           | 20 | (71.4) | 28 | 3.7 (1.5, 10.6)       | <.01                         | 9  | (75.0) | 12 | 4.5 (1.1, 26.9)       | .04     |
| Anxiety                                    | 1        | (0.7)  | 134                           | 3  | (10.7) | 28 | 15.5 (1.2, 843.8)     | .03                          | 1  | (15.4) | 12 | 11.6 (.1, 956.0)      | .3      |
| Headache                                   | 2        | (1.5)  | 132                           | 5  | (17.9) | 28 | 13.8 (2.1, 152.6)     | <.01                         | 2  | (15.4) | 13 | 11.4 (.8, 171.2)      | .1      |
| Severe headache                            | 0        | (0)    | 134                           | 0  | (0)    | 28 | N/A                   | N/A                          | 1  | (7.7)  | 13 | 10.3 (.5, $\infty$ )  | .09     |
| Abdominal pain                             | 0        | (0)    | 135                           | 0  | (0)    | 28 | N/A                   | N/A                          | 2  | (15.4) | 13 | 26.8 (3.1, $\infty$ ) | <.01    |
| Vomiting, emesis, nausea                   | 0        | (0)    | 133                           | 6  | (21.4) | 28 | 46.7 (8.5, $\infty$ ) | <.0001                       | 3  | (23.1) | 13 | 45.7 (6.7, $\infty$ ) | <.001   |
| <b>Vitals</b>                              |          |        |                               |    |        |    |                       |                              |    |        |    |                       |         |
| Fever ( $>38^{\circ}\text{C}$ )            | 20       | (47.6) | 42                            | 8  | (80.0) | 10 | 4.3 (.7, 46.1)        | .1                           | 3  | (60.0) | 5  | 1.6 (.2, 21.4)        | 1.0     |
| Tachycardia ( $>90\text{bpm}$ )            | 8        | (53.3) | 15                            | 5  | (71.4) | 7  | 2.2 (.2, 29.0)        | .7                           | 1  | (50.0) | 2  | 0.8 (.1, 78.4)        | .1      |
| Systolic hypotension ( $<90\text{ mmHg}$ ) | 2        | (18.2) | 11                            | 4  | (66.7) | 6  | 7.6 (.6, 151.7)       | .1                           | 0  | (0)    | 1  | 0.4 (0, 4.7)          | .7      |
| Diastolic hypotension ( $<60\text{mmHg}$ ) | 1        | (10.0) | 10                            | 5  | (83.3) | 6  | 29.2 (1.6, $\infty$ ) | .02                          | 0  | (0)    | 1  | 5.0 (0, 95.0)         | .8      |
| <b>Skin</b>                                |          |        |                               |    |        |    |                       |                              |    |        |    |                       |         |
| Lymphadenopathy                            | 21       | (15.7) | 134                           | 12 | (42.9) | 28 | 3.9 (1.5, 10.6)       | <.01                         | 0  | (0)    | 13 | 0.3 (0, 1.5)          | .1      |
| <b>Lesion characteristics</b>              |          |        |                               |    |        |    |                       |                              |    |        |    |                       |         |
| <b>Eschar</b>                              |          |        |                               |    |        |    |                       |                              |    |        |    |                       |         |
| 1                                          | 110      | (84.0) | 132                           | 21 | (75.0) | 26 | Reference             | -                            | 9  | (69.2) | 13 | Reference             | -       |
| 2+                                         | 22       | (16.8) | 131                           | 4  | (15.4) | 26 | 0.9 (.2, 3.2)         | 1.0                          | 4  | (30.8) | 13 | 2.2 (.5, 8.8)         | .4      |
| Head or neck lesion                        | 52       | (39.4) | 132                           | 5  | (20.0) | 25 | 0.4 (.2, 1.2)         | .1                           | 6  | (46.2) | 13 | 1.3 (.3, 5.1)         | .9      |
| Head or neck edema                         | 47       | (35.1) | 134                           | 5  | (17.9) | 28 | 0.4 (.1, 1.2)         | .1                           | 5  | (41.7) | 12 | 1.5 (.4, 5.7)         | .6      |
| On or crosses a joint                      | 59       | (44.7) | 132                           | 15 | (60.0) | 25 | 1.8 (.7, 5.0)         | .2                           | 4  | (30.8) | 13 | 0.6 (.1, 2.1)         | .5      |
| Skin trauma <sup>b</sup>                   | 8        | (5.9)  | 135                           | 6  | (21.4) | 28 | 4.9 (1.2, 19.0)       | .02                          | 2  | (15.4) | 13 | 3.3 (.3, 20.4)        | .4      |
| Thoracic edema                             | 9        | (6.7)  | 135                           | 7  | (25.0) | 28 | 4.6 (1.3, 15.7)       | .02                          | 3  | (23.1) | 13 | 4.1 (.6, 20.5)        | .1      |
| Malignant pustule edema <sup>c</sup>       | 16       | (12.0) | 133                           | 8  | (34.8) | 23 | 3.9 (1.2, 11.7)       | .02                          | 4  | (50.0) | 8  | 7.4 (1.2, 42.5)       | .03     |
| <b>Neurologic</b>                          |          |        |                               |    |        |    |                       |                              |    |        |    |                       |         |

|                                                           |    |        |     |           |    |                 |        |   |        |    |                 |      |
|-----------------------------------------------------------|----|--------|-----|-----------|----|-----------------|--------|---|--------|----|-----------------|------|
| Non-headache non-meningeal signs <sup>d</sup>             | 1  | (0.7)  | 135 | 18 (64.3) | 28 | 221.9 (29.9, ∞) | <.0001 | 3 | (23.1) | 13 | 37.0 (2.8, ∞)   | .01  |
| Other                                                     |    |        |     |           |    |                 |        |   |        |    |                 |      |
| Evidence of coagulopathies                                | 1  | (0.7)  | 135 | 4 (16.0)  | 25 | 24.7 (2.3, ∞)   | <.001  | 0 | (0)    | 12 | 11.3 (0, 213.8) | .9   |
| Laboratory                                                |    |        |     |           |    |                 |        |   |        |    |                 |      |
| Leukocytosis (>12×10 <sup>3</sup> /μL)                    | 36 | (46.8) | 77  | 6 (100.0) | 6  | 8.9 (1.6, ∞)    | .01    | 0 | (0)    | 3  | 10 (0, 190.0)   | .9   |
| Thrombocytopenia (<130×10 <sup>3</sup> /mm <sup>3</sup> ) | 1  | (20.0) | 5   | 1 (50.0)  | 2  | 4.9 (.1, 389.5) | .6     | 0 | (0)    | 0  | 0.2 (0, 1.8)    | .1   |
| Hemoconcentration <sup>e</sup>                            | 5  | (27.8) | 18  | 1 (25.0)  | 4  | 0.9 (0, 14.3)   | 1.0    | 0 | (0)    | 3  | 0.8 (0, 5.8)    | .4   |
| Complications                                             |    |        |     |           |    |                 |        |   |        |    |                 |      |
| Bacteremia                                                |    |        |     |           |    |                 |        |   |        |    |                 |      |
| At presentation                                           | 1  | (0.7)  | 135 | 1 (3.6)   | 28 | 4.9 (.1, 392.4) | .6     | 0 | (0)    | 13 | 10.4 (0, 197.3) | .9   |
| Throughout hospitalization                                | 1  | (0.7)  | 135 | 11 (39.3) | 28 | 82.5 (10.9, ∞)  | <.0001 | 3 | (23.1) | 13 | 37.6 (2.8, ∞)   | <.01 |

Abbreviations: CI, confidence interval; N/A, not applicable; OR, Odds Ratio.

<sup>a</sup> Geographic regions of countries based on World Health Organization classification system.

<sup>b</sup> Skin trauma is defined as the presence of insect or other bites, lacerations, or other open wounds.

<sup>c</sup> Cases demonstrating symptoms of shock or treatment with vasopressors excluded (n=10).

<sup>d</sup> Non-headache, non-meningeal signs include seizure, cranial nerve signs, limb weakness, papilledema.

<sup>e</sup> Hemoconcentration defined by sex specific elevations in hemoglobin (male 14.0-18.0 g/dL; female 11.5-15.5 g/dL) or hematocrit (male 39-49%; female 33-43%) values.
